# Supplementary material for: Expression of Steroid Receptor RNA Activator 1 (SRA1) in the Adipose Tissue Is Associated with TLRs and IRFs in Diabesity
Source: MDPI journal article supplement (doi:10.3390/cells11244007), 2022-12-11
Supplement: s1 [file s1]

**Table S1.** Demographic and clinical characteristics of study population. (Published Cells 2021, 10(10), 2602; <https://doi.org/10.3390/cells10102602>)

|                             | Total Participants (n=108)       |                     |                       |            |           |                              |                       |                       |            |           |                           |
|-----------------------------|----------------------------------|---------------------|-----------------------|------------|-----------|------------------------------|-----------------------|-----------------------|------------|-----------|---------------------------|
|                             | Non-diabetic (N=55) Median (IQR) |                     |                       |            |           | Diabetic (N=53) Median (IQR) |                       |                       |            |           |                           |
|                             | Lean                             | Overweight          | Obese                 | Lean vs.   | Lean vs.  | Lean                         | Overweight            | Obese                 | Lean vs.   | Lean vs.  | Non-diabetic vs. Diabetic |
|                             | (n = 8)                          | (n = 19)            | (n =28)               | Overweight | Obese     | (N=4)                        | (N=13)                | (N=36)                | Overweight | Obese     | (p value)                 |
|                             |                                  |                     |                       | (p value)  | (p value) |                              |                       |                       | (p value)  | (p value) |                           |
| Age (years)                 | 42.00(36.00-50.25)               | 42.00(35.00-52.00)  | 46.50(36.00-59.00)    | 0.688      | 0.387     | 56(49.75-57.75)              | 54.00(53.00-57.00)    | 53.00(46.00-58.00)    | 0.608      | 0.557     | <0.001                    |
| Weight (kg)                 | 61.00(58.40-77.33)               | 79(70.2-88)         | 91.75(84.83-105.70)   | 0.004      | <0.0001   | 68.85(57.9-69.75)            | 77.7(72.5-85.25)      | 93.50(83.08-99.70)    | 0.024      | 0.001     | 0.327                     |
| Height (cm)                 | 1.66(1.55-1.80)                  | 1.67(1.59-1.76)     | 1.65(1.55-1.73)       | 0.906      | 0.422     | 1.65(1.538-1.665)            | 1.66(1.61-1.72)       | 1.69(1.58-1.73)       | 0.461      | 0.223     | 0.784                     |
| BMI (kg/m <sup>2</sup> )    | 23.81(22.07-24.56)               | 28.43(27.26-29.4)   | 35.20(31.65-37.23)    | <0.0001    | <0.0001   | 24.99(24.28-25.59)           | 28.2(27.13-28.87)     | 33.35(31.47-35.56)    | 0.013      | 0.001     | 0.417                     |
| Waist circumference (cm)    | 81.00(77.00-97.00)               | 96(89-101.8)        | 109.00(99.00-117.00)  | 0.014      | <0.0001   | 82(76-87)                    | 98.00(93.00-103.00)   | 110(104.5-114)        | 0.024      | 0.005     | 0.052                     |
| HIP circumference (cm)      | 103.00(91.50-105.00)             | 103.50(97.00-111.5) | 120.00(109.50-125.00) | 0.324      | <0.0001   | 100.00(93.00-106.00)         | 104.00(101.00-111.00) | 113.80(110.00-120.80) | 0.273      | 0.015     | 0.768                     |
| WHR                         | 0.82(0.74-0.94)                  | 0.95(0.82-1.02)     | 0.91(0.81-1.00)       | 0.105      | 0.072     | 0.8172(0.78-0.87)            | 0.93(0.90-1.01)       | 0.9571(0.8789-1.018)  | 0.016      | 0.021     | 0.089                     |
| Body fat (%)                | 26.90(22.30-36.70)               | 30.9(28.43-37.63)   | 39.90(36.78-43.63)    | 0.074      | <0.0001   | 34.8(27.70-36.50)            | 30.7(26.00-37.30)     | 38(32.2-41.85)        | 0.938      | 0.181     | 0.984                     |
| Fasting plasma glucose (mM) | 4.90(4.32-5.18)                  | 5.1(4.9-5.43)       | 5.20(4.75-5.88)       | 0.27       | 0.186     | 7.7(5.65-9.953)              | 8.72(6.92-11.13)      | 8.15(6.6-10.03)       | 0.362      | 0.471     | <0.0001                   |
| Triglycerides (mmol/L)      | 0.62(0.43-0.89)                  | 1.3(0.64-1.65)      | 1.05(0.72-1.53)       | 0.014      | 0.042     | 0.97(0.47-1.88)              | 1.79(0.84-2.40)       | 1.395(1.113-1.818)    | 0.225      | 0.131     | <0.001                    |
| Total cholesterol (mmol/L)  | 5.35(3.88-6.04)                  | 5(4.48-5.42)        | 4.75(4.16-6.05)       | 0.769      | 0.943     | 4.48(3.8-6.54)               | 4.09(3.85-5.56)       | 4.94(4.1-5.745)       | 0.544      | 0.701     | 0.314                     |
| HDL cholesterol (mmol/L)    | 1.59(1.18-2.01)                  | 1.2(1.08-1.36)      | 1.16(1.02-1.38)       | 0.033      | 0.041     | 1.14(0.97-1.3)               | 1.03(0.89-1.31)       | 1.11(0.95-1.36)       | 0.671      | 0.835     | 0.096                     |
| LDL (mmol/L)                | 3.55(2.33-3.93)                  | 3.1(2.6-3.7)        | 3.25(2.60-4.00)       | 0.995      | 0.746     | 2.9(2.38-4.63)               | 2.3(1.8-3.55)         | 2.85(2.275-3.75)      | 0.202      | 0.686     | 0.069                     |
| HbA1c (%)                   | 5.50(5.15-5.85)                  | 5.5(5.18-5.73)      | 5.83(5.43-5.98)       | 0.946      | 0.404     | 7.3(5.90-8.70)               | 7.7(6.575-10.18)      | 8.1(7.35-9.175)       | 0.544      | 0.367     | <0.0001                   |
| Fasting insulin (mU/L)      | 5.56(5.04-11.51)                 | 6.08(4.99-15.67)    | 17.38(7.32-34.58)     | 0.448      | 0.015     | 13.37(4.08-30.63)            | 10.37(6.277-17.16)    | 17.15(7.909-43.42)    | 0.735      | 0.48      | 0.008                     |

|                      |                 |                  |                  |       |              |                 |                 |                   |       |       |                   |
|----------------------|-----------------|------------------|------------------|-------|--------------|-----------------|-----------------|-------------------|-------|-------|-------------------|
| HOMA-IR              | 1.31(1.00-2.53) | 1.351(1.16-3.61) | 4.09(1.89-10.91) | 0.419 | <b>0.01</b>  | 5.53(1.11-7.49) | 3.03(2.59-6.01) | 5.74(3.078-17.69) | 0.735 | 0.377 | <b>&lt;0.0001</b> |
| SRA mRNA(Fold level) | 1.74(1.59-1.85) | 1.822(1.23-2.20) | 2.03(1.75-2.57)  | 0.489 | <b>0.015</b> | 2.51(1.26-3.01) | 1.69(1.24-1.90) | 1.814(1.35-2.567) | 0.296 | 0.419 | 0.373             |

BMI, body mass index; WHR, Waist/Hip ratio; HDL, high-density lipoprotein; LDL, low-density lipoprotein; HbA1c, glycated hemoglobin; SD, standard deviation

**Supplementary Table S2.** List of TaqMan gene expression assays

| Gene Name | Assay ID      | Gene Name      | Assay ID      |
|-----------|---------------|----------------|---------------|
| SRA1      | Hs00398296_g1 | NF- $\kappa$ B | Hs00765730_m1 |
| TLR2      | Hs01872448_s1 | MyD88          | Hs01573837_g1 |
| TLR3      | Hs01551078_m1 | IRAK1          | Hs01018347_m1 |
| TLR4      | Hs00152939_m1 | TRAF6          | Hs00371512_g1 |
| TLR5      | Hs01920773_s1 | IRF3           | Hs01547283_m1 |
| TLR7      | Hs01933259_s1 | IRF4           | Hs01056533_m1 |
| TLR8      | Hs00152972_m1 | IRF5           | Hs00158114_m1 |
| TLR9      | Hs00370913_s1 | GAPDH          | Hs03929097_g1 |
| TLR10     | Hs01935337_s1 |                |               |

Supplementary Figure S1

H&E Staining

Lean Individuals

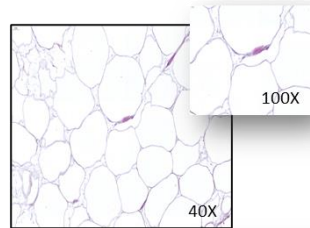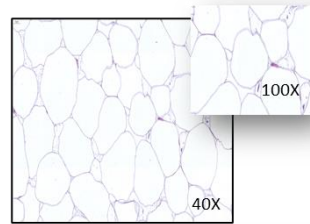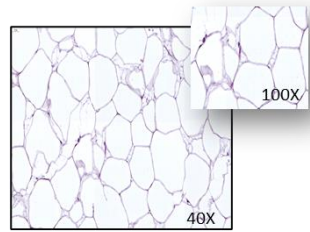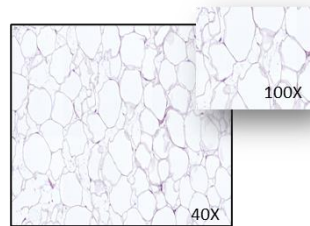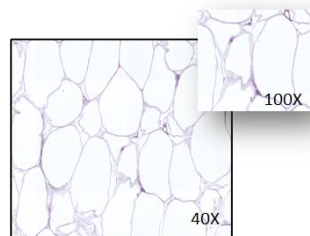

Obese Individuals

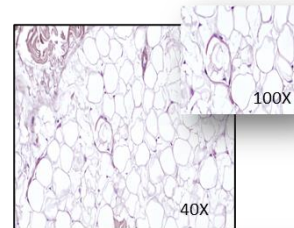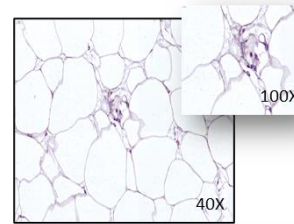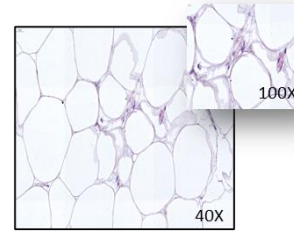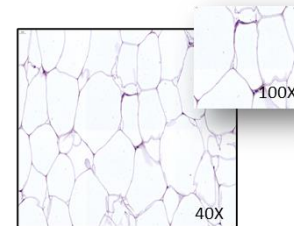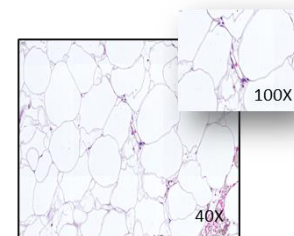

**H&E Methodology:**

For H&E staining, human adipose tissue samples were formalin-fixed, paraffin-embedded, and sectioned at 4  $\mu\text{m}$ . For hematoxylin and eosin (H&E) staining, sections were deparaffinized and dehydrated with xylenes and ethanol. Briefly, slides were stained with hematoxylin, washed with water and 95% ethanol, and stained with eosin for 30 min. Sections were then incubated with ethanol and xylene, and mounted with mounting medium.
